# Supplementary material for: Scission and stitching of adenine structures by water molecules
Source: Royal Society of Chemistry journal article supplement (doi:10.1039/c7cc09086b), 2018-01-01
Supplement: c7cc09086b1.pdf [file c7cc09086b1.pdf]

# Scission and Stitching of Adenine Structures by Water Molecules

## *Supporting Information*

Chi Zhang, Lei Xie, Yuanqi Ding, Wei Xu\*

Interdisciplinary Materials Research Center, College of Materials Science and Engineering, Tongji University, Shanghai 201804, P. R. China.

E-mail: [xuwei@tongji.edu.cn](mailto:xuwei@tongji.edu.cn)

### **Experimental details**

All STM experiments were performed in a UHV chamber (base pressure  $1 \times 10^{-10}$  mbar) equipped with a variable-temperature, fast-scanning “Aarhus-type” STM using electrochemically etched W tips purchased from SPECS,<sup>1,2</sup> a molecular evaporator and an e-beam evaporator, and other standard instrumentation for sample preparation. The Au(111) substrate was prepared by several cycles of 1.5 keV Ar<sup>+</sup> sputtering followed by annealing to 800 K for 15 min, resulting in clean and flat terraces separated by monatomic steps. The adenine molecule was purchased from Sigma-Aldrich (purity > 99%). The pure distilled water was loaded in a dosing tube positioned in the preparation chamber and further purified under vacuum by several freeze-thaw cycles to remove remaining impurities.<sup>3</sup> After a thorough degassing, the A molecules were deposited onto the Au(111) surface by thermal sublimation. Water molecules were then continuously dosed *in situ* onto the Au(111) surface through a leak valve at different pressures for 10 minutes. The sample was thereafter transferred within the UHV chamber to the STM, where measurements were carried out at ~150 K. All the STM images were further smoothed to eliminate noises. The lateral manipulations were carried out in a controllable line-scan mode under specific scanning conditions (by increasing the tunnel current up to approximately 2.0 nA while reducing the tunnel voltage down to approximately 20 mV).<sup>4,5</sup>

The calculations were performed in the framework of DFT by using the Vienna ab initio simulation package (VASP).<sup>6,7</sup> The projector-augmented wave method was used to describe the interaction between ions and electrons;<sup>8,9</sup> the Perdew-Burke-Ernzerhof generalized gradient approximation exchange-correlation functional was employed,<sup>10</sup> and van der Waals interactions were included using the dispersion-corrected DFT-D3 method of Grimme.<sup>11</sup> The atomic structures were relaxed using the conjugate gradient algorithm scheme as implemented in the VASP code until the forces on all unconstrained atoms were  $\leq 0.03$  eV/Å. The simulated STM images were obtained by the Hive program based on the Tersoff-Hamann method.<sup>12,13</sup>

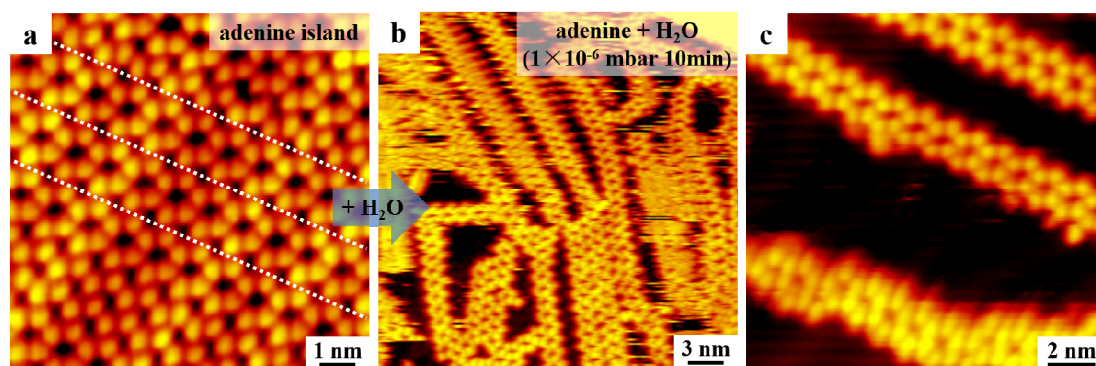

**Figure S1.** (a) STM image showing the adenine island structure, where molecular rows are made up of characteristic six-membered rings of adenine molecules as separated by dotted lines. (b) Large-scale STM image showing the appearance of single adenine molecular rows after exposing the adenine island structure to the water atmosphere at a pressure of  $\sim 1 \times 10^{-6}$  mbar for 10 min (held at RT). (c) Close-up high-resolution STM image showing the morphology of the single adenine molecular rows, which is in good accordance with the ones in the self-assembled adenine island. Scanning conditions:  $I_t = 0.7$  nA,  $V_t = -1.5$  V.

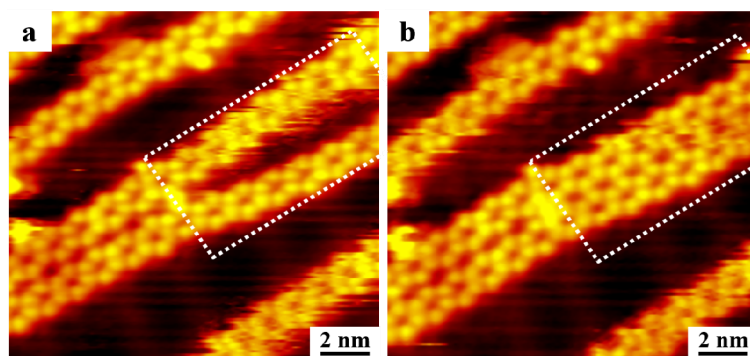

**Figure S2.** Sequential STM images scanned in the same region showing that two rows can wobble around reforming the A island structure via inter-chain hydrogen bonds as highlighted by the rectangles. Scanning conditions:  $I_t = 0.7$  nA,  $V_t = 1.8$  V.

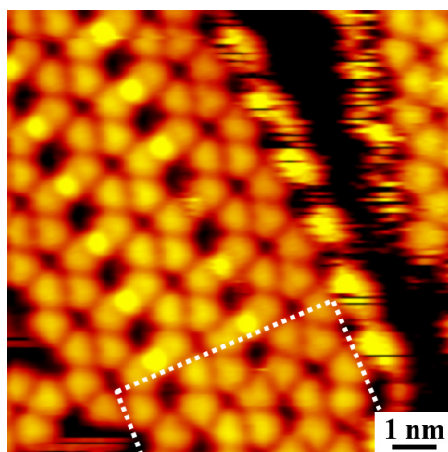

**Figure S3.** STM image showing the coexistence of a small patch of the intact A self-assembled structure (the highlighted part) and the A-H<sub>2</sub>O structure in one island.

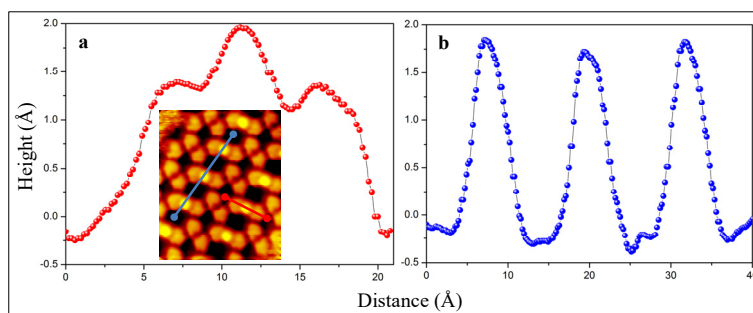

**Figure S4.** The corresponding line profiles along the red and blue lines marked in the STM image (inset in a), respectively.

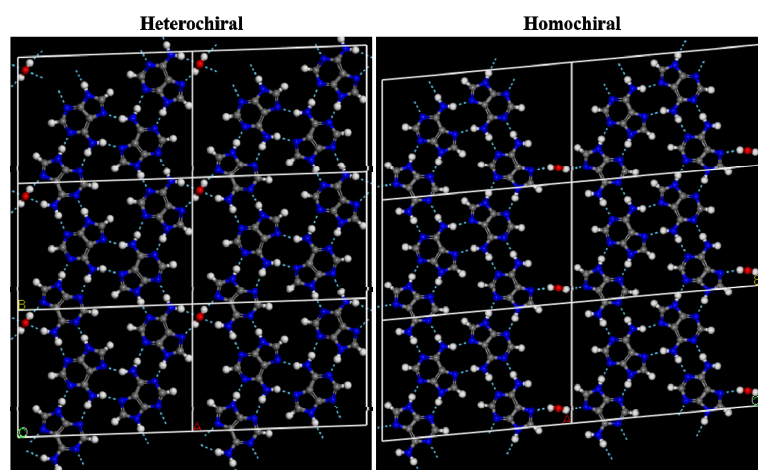

**Figure S5.** The DFT-optimized structural models for the two kinds of A-H<sub>2</sub>O islands (with heterochiral and homochiral adenine molecules involved), where the unit cells are slightly different.

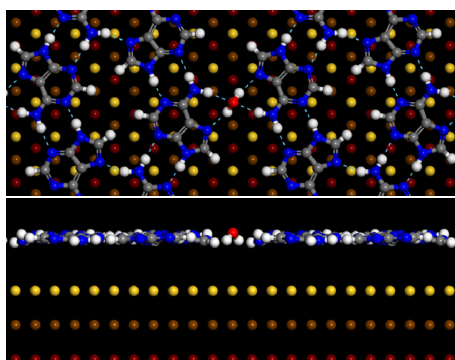

**Figure S6.** Top and side views of the DFT-optimized structural model for the A-H<sub>2</sub>O island (with heterochiral adenine molecules, for example) including the gold substrate, where the water molecule is still a little bit higher than the adenine molecular plane and O atom of water molecule is positioned at the highest point out of the A molecular plane, which is similar to the corresponding gas-phase structural model. Such configuration results in the bright protrusions in the STM images and agrees with the line profile.

## References

- 1 F. Besenbacher, *Rep. Prog. Phys.*, 1996, **59**, 1737.
- 2 E. Lægsgaard, L. Österlund, P. Thostrup, P. B. Rasmussen, I. Stensgaard and F. Besenbacher, *Rev. Sci. Instrum.*, 2001, **72**, 3537.
- 3 J. Chen, J. Guo, X. Meng, J. Peng, J. Sheng, L. Xu, Y. Jiang, X. Z. Li and E. G. Wang, *Nat. Commun.*, 2014, **5**, 4056.
- 4 W. Xu, H. Kong, C. Zhang, Q. Sun, H. Gersen, L. Dong, Q. Tan, E. Laegsgaard and F. Besenbacher, *Angew. Chem. Int. Ed.*, 2013, **52**, 7442.
- 5 M. Yu, W. Xu, Y. Benjalal, R. Barattin, E. Laegsgaard, I. Stensgaard, M. Hliwa, X. Bouju, A. Gourdon, C. Joachim, T. R. Linderoth and F. Besenbacher, *Nano Res.*, 2009, **2**, 254.
- 6 G. Kresse and J. Hafner, *Phys. Rev. B*, 1993, **48**, 13115.
- 7 G. Kresse and J. Furthmüller, *Phys. Rev. B*, 1996, **54**, 11169.
- 8 P. E. Blöchl, *Phys. Rev. B*, 1994, **50**, 17953.
- 9 G. Kresse and D. Joubert, *Phys. Rev. B*, 1999, **59**, 1758.
- 10 J. P. Perdew, K. Burke and M. Ernzerhof, *Phys. Rev. Lett.*, 1996, **77**, 3865.
- 11 S. Grimme, J. Antony, S. Ehrlich and H. Krieg, *J. Chem. Phys.*, 2010, **132**, 154104.
- 12 J. Tersoff and D. R. Hamann, *Phys. Rev. B*, 1985, **31**, 805.
- 13 D. E. P. Vanpoucke and G. Brocks, *Phys. Rev. B*, 2008, **77**, 241308.
